# Supplementary material for: Cycloplatinated(ii) complexes bearing 1,1′-bis(diphenylphosphino)ferrocene ligand: biological evaluation and molecular docking studies
Source: Royal Society of Chemistry journal article supplement (doi:10.1039/c7nj04183g), 2017-12-05
Supplement: c7nj04183g1.pdf [file c7nj04183g1.pdf]

## Electronic Supplementary Information

### **Cycloplatinated(II) complexes bearing 1,1'-bis(diphenylphosphino)ferrocene ligand: Biological evaluation and molecular docking studies**

*Masood Fereidoonzehad,<sup>a</sup> Hamid R. Shamsavari,<sup>\*b</sup> Sedigheh Abedanzadeh,<sup>c</sup> Behnoosh Behchenari,<sup>la</sup> Mojdeh Hossein-Abadi,<sup>lb</sup> Zahra Faghih,<sup>d</sup> and M. Hassan Beyzavi<sup>\*e</sup>*

<sup>a</sup>Department of Medicinal Chemistry, School of Pharmacy; Cancer, Environmental and Petroleum Pollutants Research Center, Ahvaz Jundishapur University of Medical Sciences, Ahvaz, Iran.

<sup>b</sup>Department of Chemistry, Institute for Advanced Studies in Basic Sciences (IASBS), Yousef Sobouti Blvd., Zanjan 45137-66731, Iran.

<sup>c</sup>Department of Chemistry, Isfahan University of Technology, Isfahan 84156, Islamic Republic of Iran.

<sup>d</sup>Shiraz Institute for Cancer Research, School of Medicine, Shiraz University of Medical Sciences, Shiraz, Iran.

<sup>e</sup>Department of Chemistry and Biochemistry, University of Arkansas, Fayetteville, Arkansas 72701, United States.

\*Email: [shamsavari@iasbs.ac.ir](mailto:shamsavari@iasbs.ac.ir). (H.R.S.), [beyzavi@uark.edu](mailto:beyzavi@uark.edu). (M.H.B.).

<sup>l</sup>These authors contributed equally to this work.

| <b>Contents:</b>                                                                                                                                                    | <b>Page</b> |
|---------------------------------------------------------------------------------------------------------------------------------------------------------------------|-------------|
| <b>Table S1.</b> <i>In vitro</i> cytotoxicity of <b>2a–2e</b> , <b>3a</b> , and <b>3b</b> against cancer cell lines <b>A549</b> , <b>SKOV3</b> , and <b>MCF-7</b> . | 3           |
| <b>Figure S1.</b> Molecular docking simulation studies of the interaction between <b>2b</b> and 1BNA.                                                               | 4           |
| <b>Figure S2.</b> Molecular docking simulation studies of the interaction between <b>2c</b> and 1BNA.                                                               | 5           |
| <b>Figure S3.</b> Molecular docking simulation studies of the interaction between <b>2e</b> and 1BNA.                                                               | 6           |
| <b>Figure S4.</b> Molecular docking simulation studies of the interaction between <b>3b</b> and 1BNA.                                                               | 7           |
| <b>Figure S5.</b> Molecular docking simulation studies of the interaction between <b>2b</b> and 1LU5.                                                               | 8           |
| <b>Figure S6.</b> Molecular docking simulation studies of the interaction between <b>2c</b> and 1LU5.                                                               | 9           |
| <b>Figure S7.</b> Molecular docking simulation studies of the interaction between <b>2e</b> and 1LU5.                                                               | 10          |
| <b>Figure S8.</b> Molecular docking simulation studies of the interaction between <b>3b</b> and 1LU5.                                                               | 11          |
| <b>Figure S9.</b> The best docked conformation of complex <b>2d</b> , in the best binding sites with 3CO3.                                                          | 12          |

**Table S1.** *In vitro* cytotoxicity against cancer cell lines.

| <b>Complex</b>           | <b>IC<sub>50</sub> (μM ± SD)</b> |              |              |
|--------------------------|----------------------------------|--------------|--------------|
|                          | <b>A549</b>                      | <b>SKOV3</b> | <b>MCF-7</b> |
| <b>2a</b>                | 6.84 ± 1.37                      | 15.65 ± 0.71 | 8.48 ± 1.12  |
| <b>2b</b>                | 28.42 ± 1.66                     | 23.99 ± 3.47 | 34.55 ± 1.59 |
| <b>2c</b>                | 7.44 ± 1.51                      | 8.79 ± 1.16  | 11.58 ± 2.18 |
| <b>2d</b>                | 3.65 ± 0.68                      | 12.69 ± 1.09 | 9.29 ± 1.35  |
| <b>2e</b>                | 18.84 ± 1.37                     | 15.81 ± 2.07 | 20.39 ± 2.65 |
| <b>3a</b>                | 27.49 ± 2.21                     | 21.26 ± 1.38 | 32.85 ± 2.64 |
| <b>3b</b>                | 24.5 ± 0.73                      | 13.60 ± 0.92 | 24.35 ± 0.89 |
| <b><i>cis-platin</i></b> | 9.75 ± 1.52                      | 18.57 ± 1.29 | 15.29 ± 1.72 |

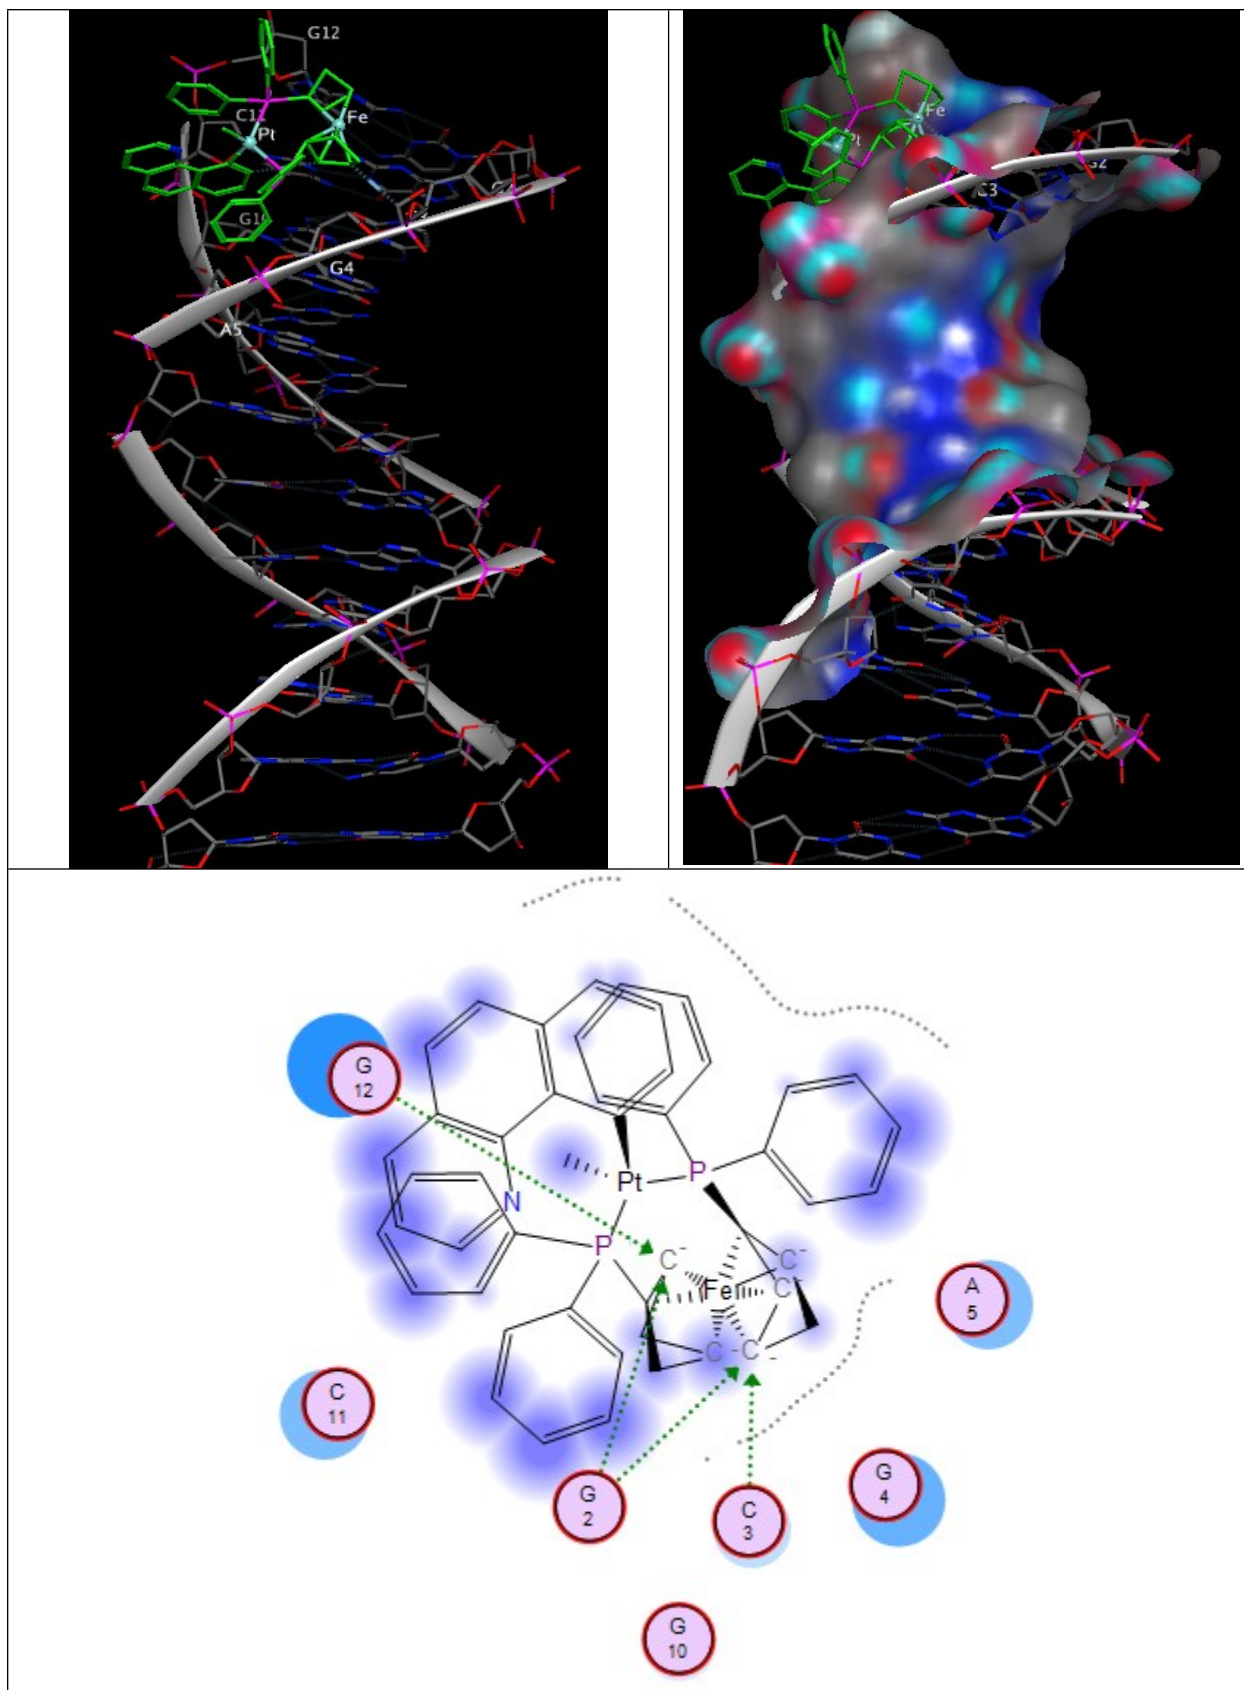

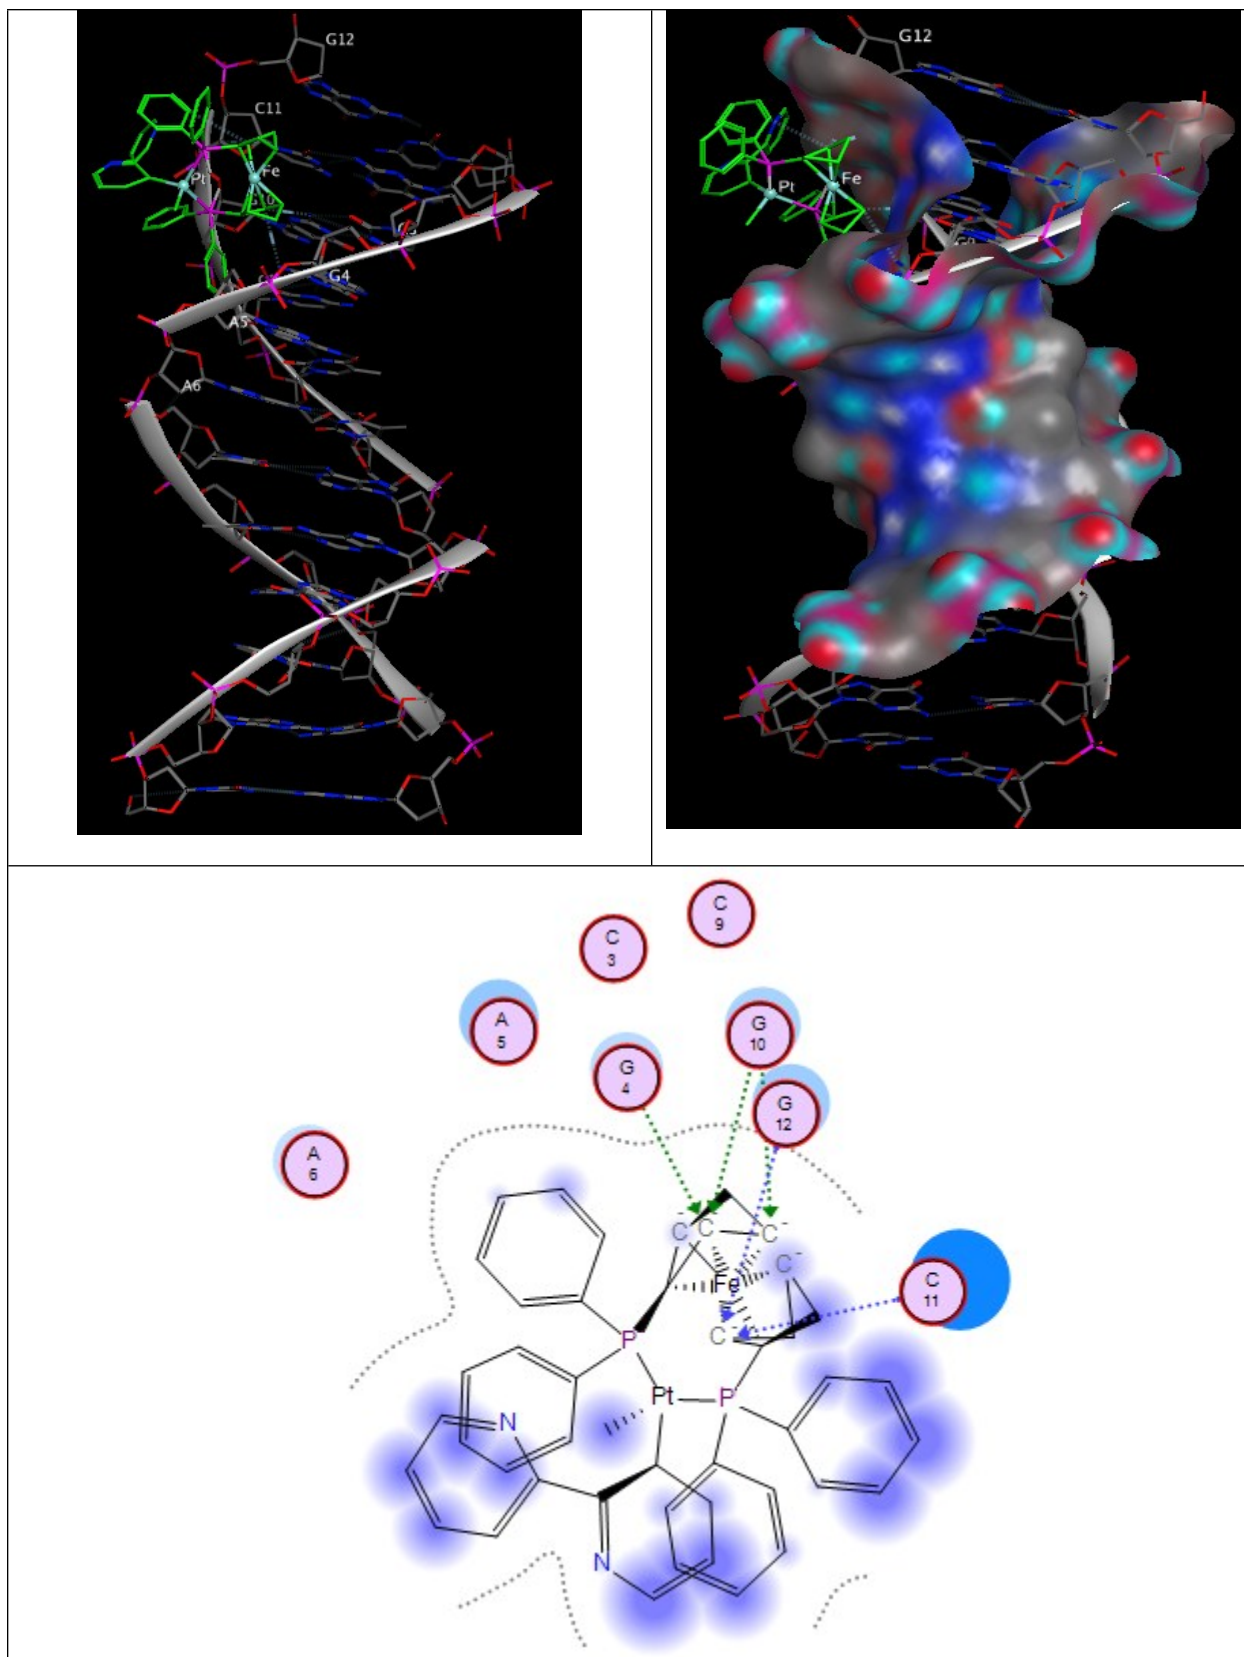

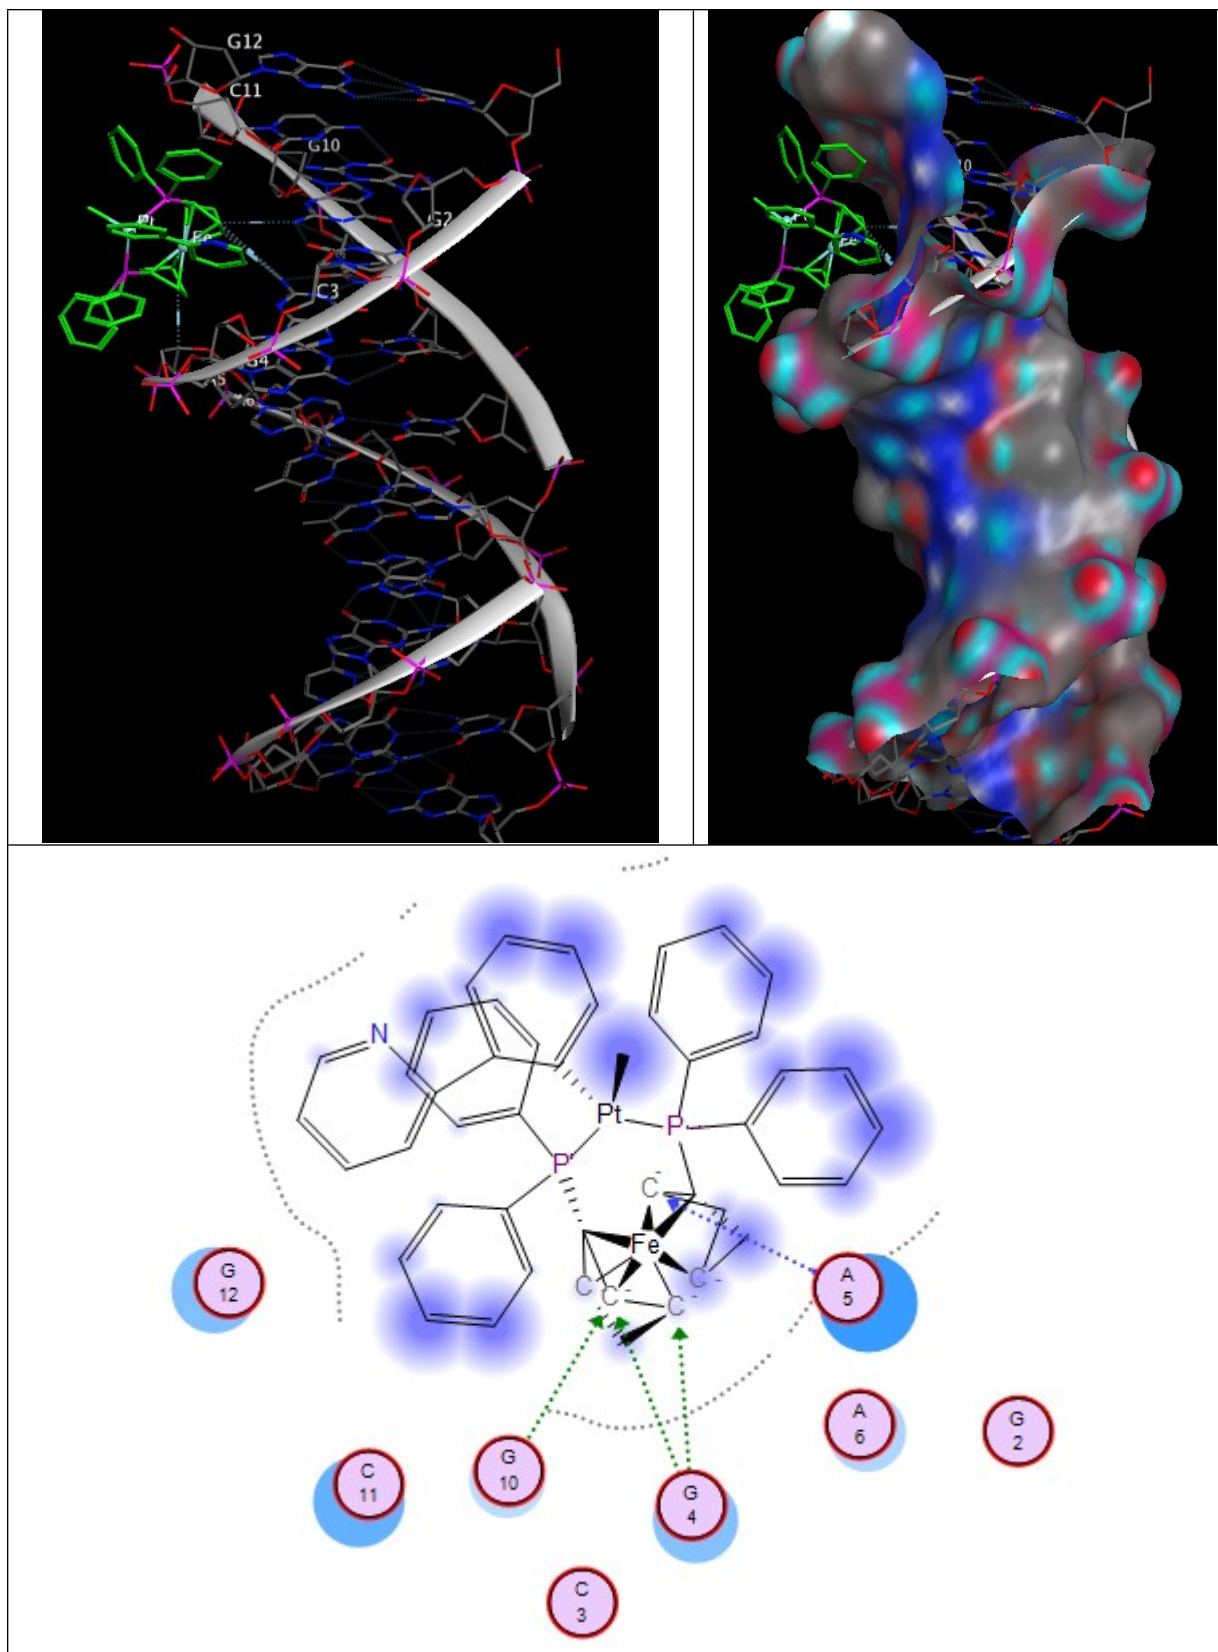

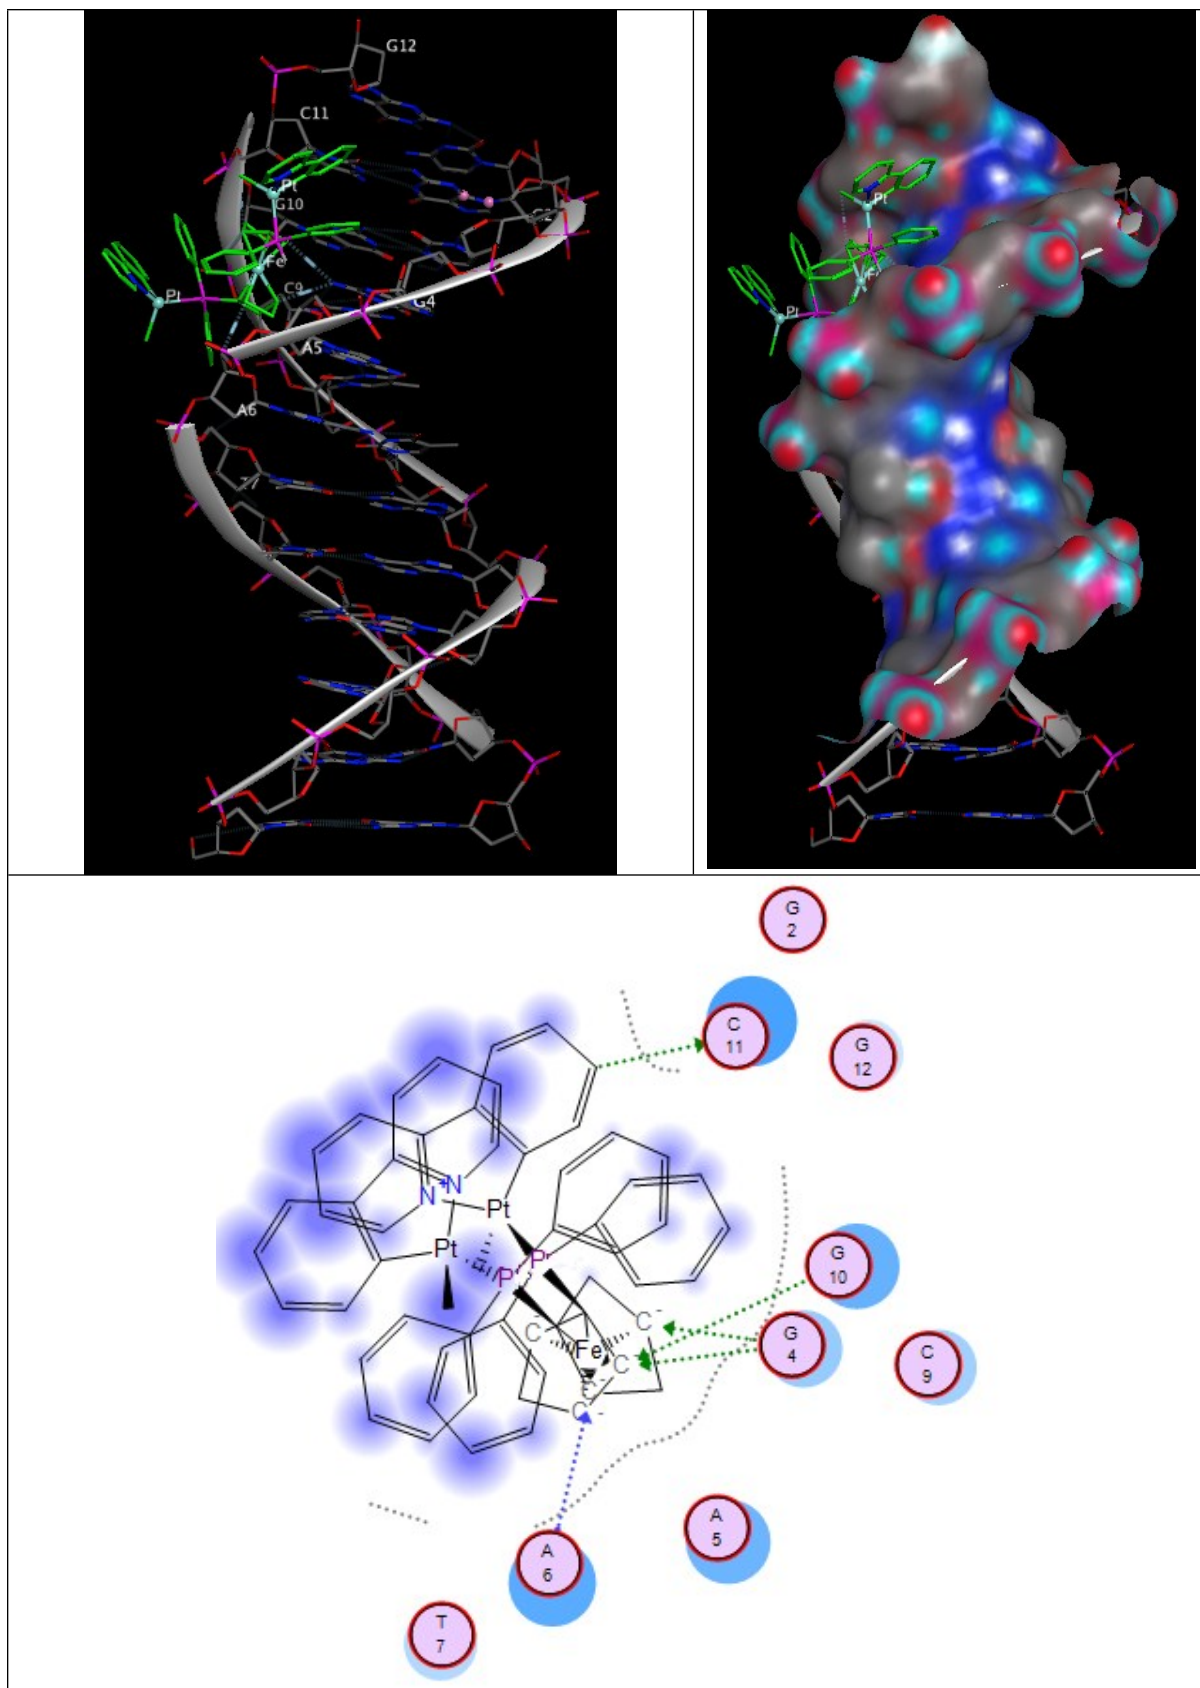

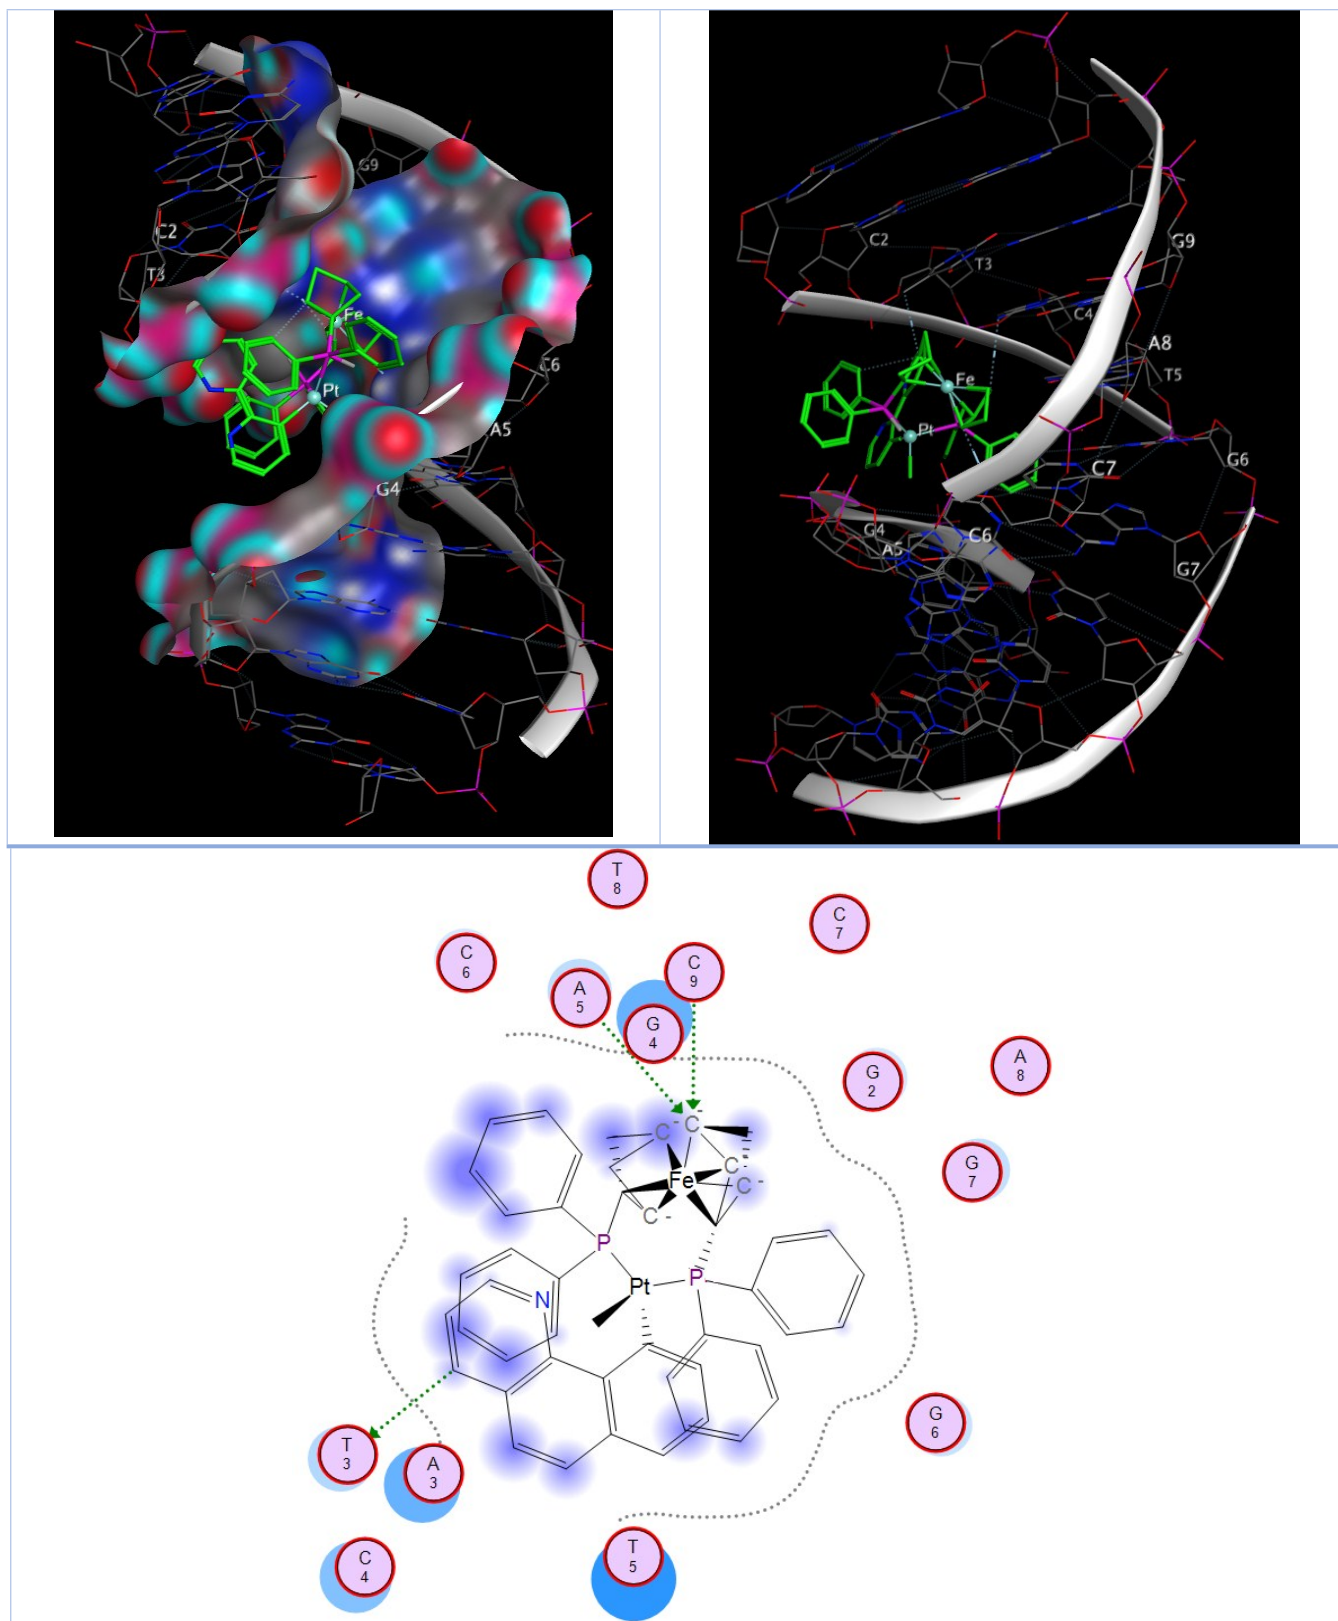



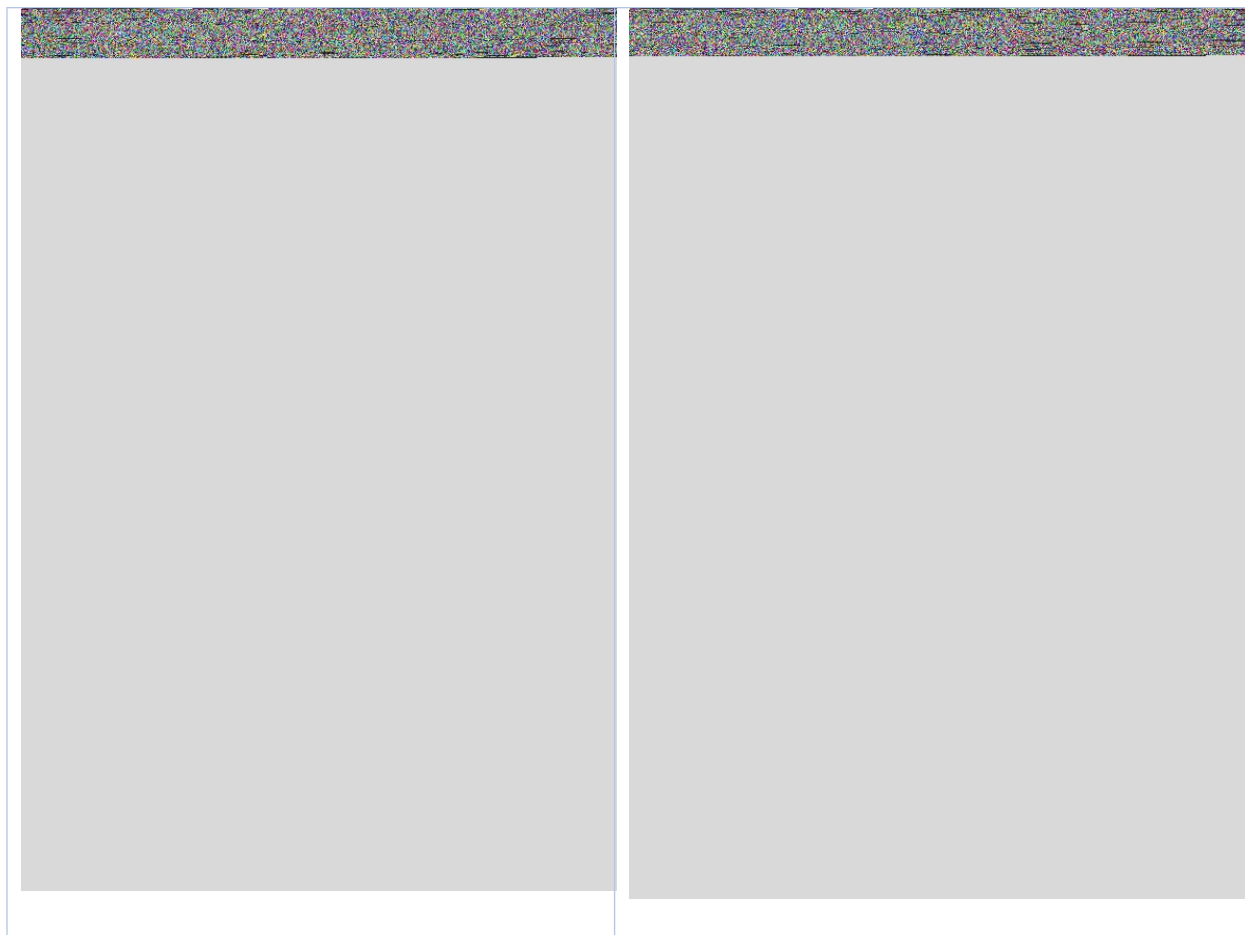

**Figure S6.** Molecular docking simulation studies of the interaction between **2c** and 1LU5.

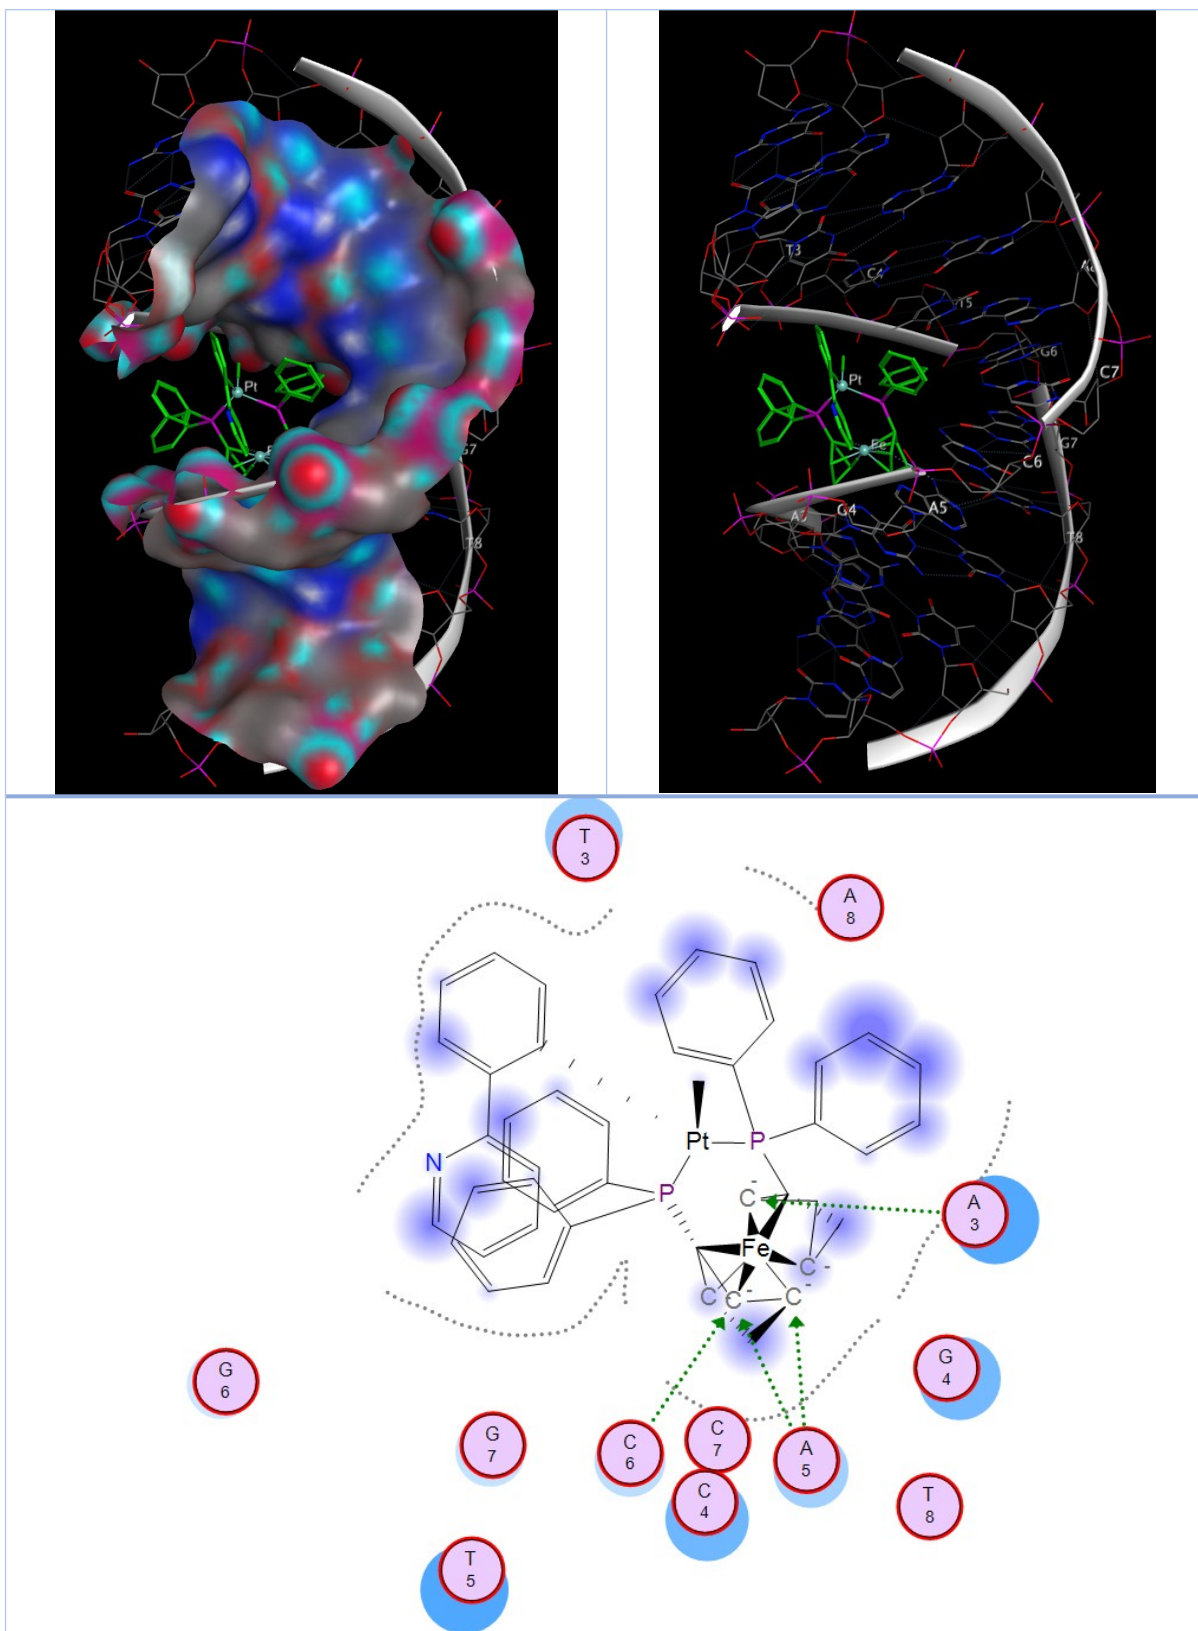

**Figure S7.** Molecular docking simulation studies of the interaction between **2e** and 1LU5.

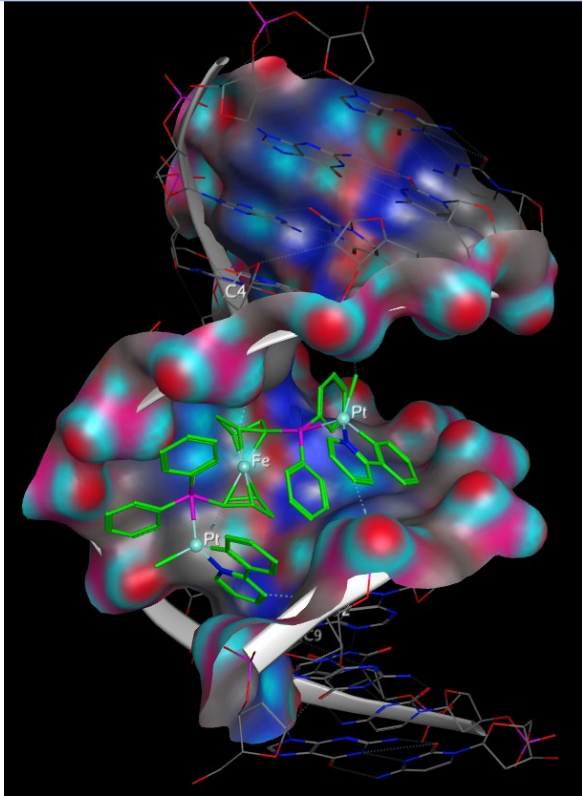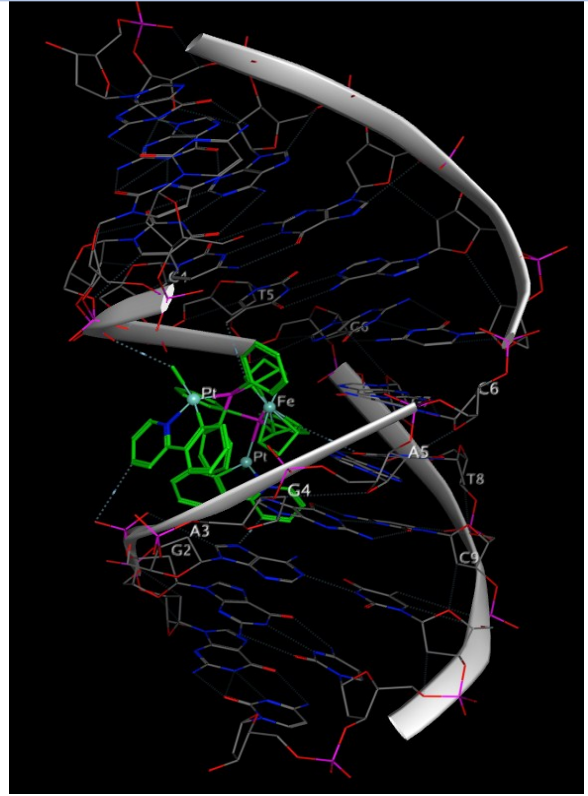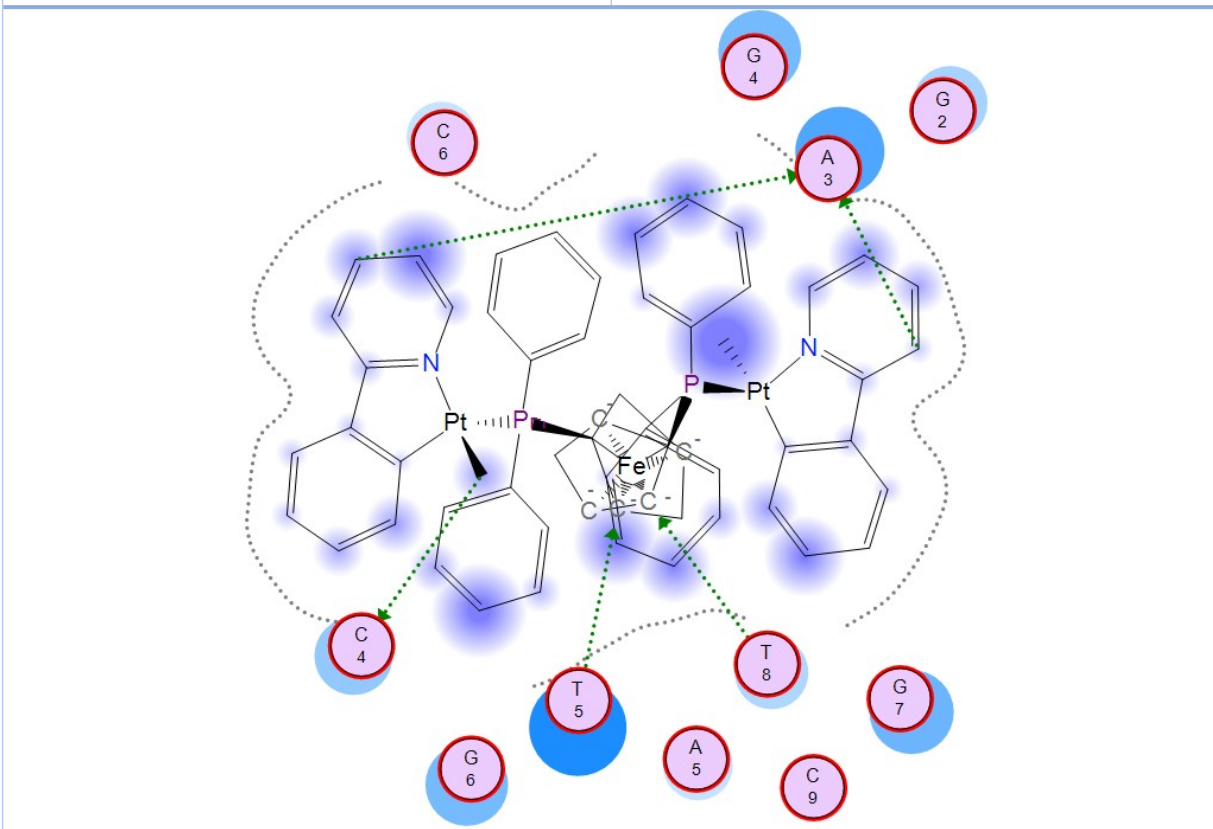

**Figure S8.** Molecular docking simulation studies of the interaction between **3b** and 1LU5.

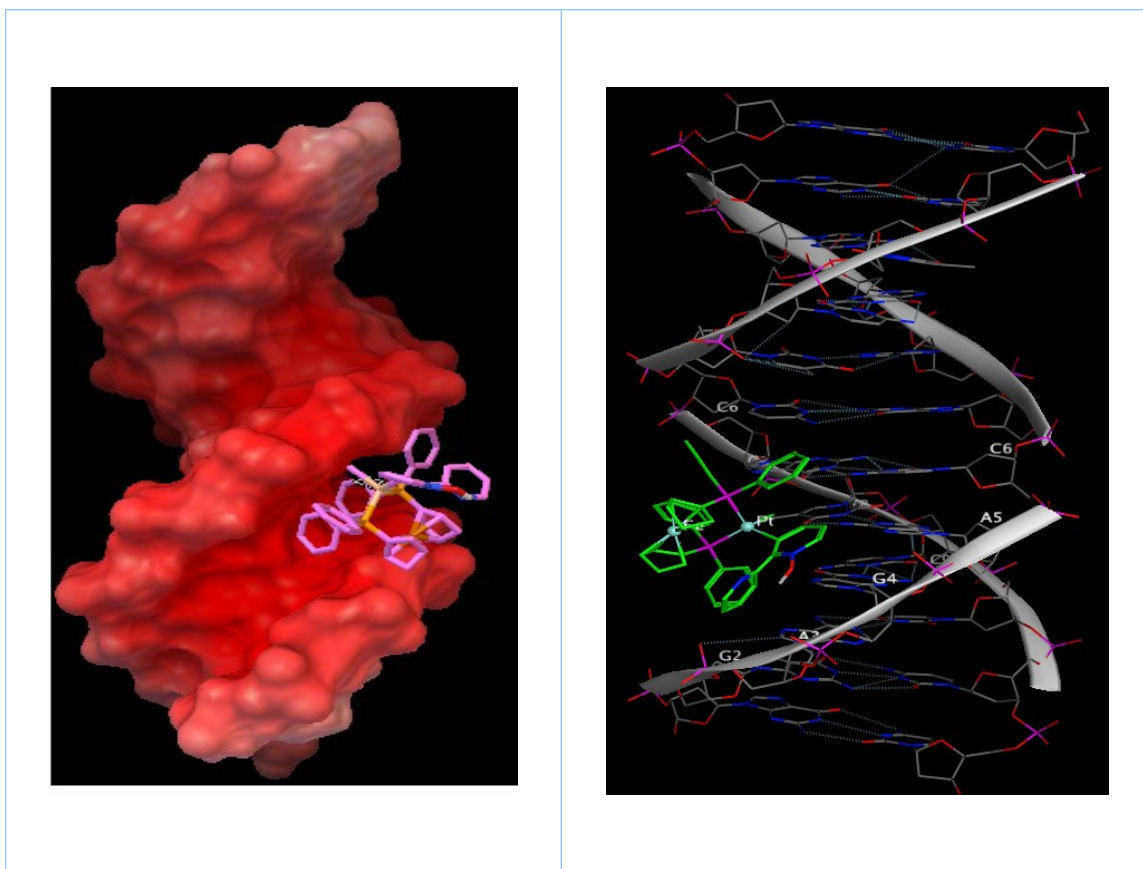

**Figure S9.** The best docked conformation of complex **2d**, in the best binding sites with 3CO3.
